# Supplementary material
Source: Springer Nature journal article supplement (https://www.springermedizin.de/resource/supplementary/13601_2014_1070_MOESM1_ESM.pdf/9678638)

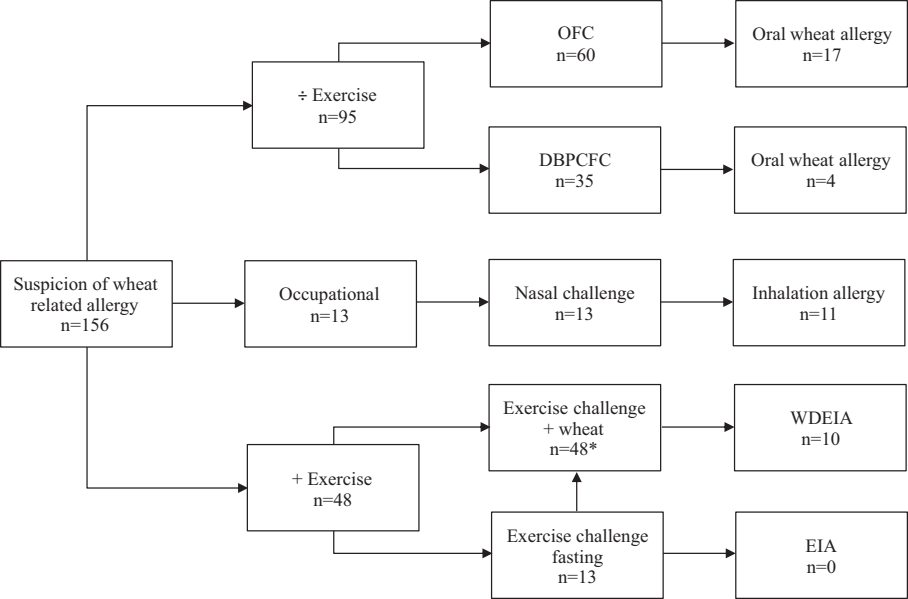

Supplement: MOESM1 [file 9678638]
